# Supplementary material for: The foundress’s dilemma: group selection for cooperation among queens of the harvester ant, Pogonomyrmex californicus
Source: PubMed Central journal article supplement (PMC4964563; doi:10.1038/srep29828), 2016-07-28
Supplement: srep29828-s1.pdf [file srep29828-s1.pdf]

1 **Supplemental material**

2 **The foundress's dilemma: group selection for cooperation among queens of the**  
3 **harvester ant, *Pogonomyrmex californicus***

4 Zachary Shaffer<sup>1\*</sup>, Takao Sasaki<sup>2</sup>, Brian Haney<sup>1</sup>, Marco Janssen<sup>3</sup>, Stephen C. Pratt<sup>1</sup>,  
5 Jennifer H. Fewell<sup>1</sup>

6 <sup>1</sup>School of Life Sciences, Arizona State University, Tempe, AZ 85287, USA

7 <sup>2</sup>Department of Zoology, University of Oxford, Oxford OX1 3PS, UK

8 <sup>3</sup>School of Sustainability, Arizona State University, Tempe, AZ 85287, USA

9 \*Correspondence to: Zachary Shaffer, mailing address: 104 E. Garfield St., Tempe, AZ  
10 85281, Email: zshaffe@asu.edu, telephone: 480-294-2901

11 **Figure S1.** Outcome of survival analysis for individual queens, classified by  
12 experimental treatment and population of origin (pleometrotic (P) or haplometrotic (H)).  
13 Queens in groups survived longer than solitary queens. There was no significant  
14 difference in survival of single haplometrotic and pleometrotic queens, and little  
15 detectable difference in survival among group treatments (see Supplementary Table 1 for  
16 details). Curves show Kaplan-Meier estimates of the survival function for each queen  
17 type in each treatment. Crosses represent censoring times for queens that were not  
18 observed for the entire 60-day period.

19 **Figure S2.** Aggressive queens in groups of six ranked by instances of aggression.  
20 Aggressive queens were found in both the pleometrotic (black) and haplometrotic (grey)  
21 populations.

22 **Figure S3.** Survival analysis for mixed pairs of queens (one queen from each  
23 population). In pairs where aggression was documented, aggressive queens (red, n=9)  
24 survived longer than their non-aggressive co-foundresses (blue, n=9) (a). Individual  
25 survival for all queens in nests with aggression (n=18) was lower than for queens in nests  
26 without aggression (n=22), although this difference was not statistically significant (b).  
27 Groups where aggression occurred (n=9) had lower survival than groups without  
28 aggression (n=11), although this difference was not statistically significant (c). Curves  
29 show Kaplan-Meier estimates of the survival function for each queen type or pair type.  
30 Crosses represent censoring times for queens that were not observed for the entire 60-day  
31 period.

32 **Figure S4.** Average fraction of cooperative queens over 100 simulations for each  
33 combination of competition radius ( $r_G$ ), cluster radius ( $r_C$ ), and population size  $m$  (the  
34 number of foundresses in each new generation).

35 **Figure S1**



36

37 **Figure S2**



38

39 **Figure S3**



40

41 **Figure S4**



42

**Supplementary Table 1.** Survival analysis of individual queens by population of origin

|                  | N   | <b>P</b><br><b>(1H:1P)</b> | <b>H</b><br><b>(1H:1P)</b> | <b>P</b><br><b>(1H:5P)</b> | <b>H</b><br><b>(1H:5P)</b> | <b>P</b><br><b>(6P)</b> | <b>P</b><br><b>(1P)</b> |
|------------------|-----|----------------------------|----------------------------|----------------------------|----------------------------|-------------------------|-------------------------|
| <b>P (1H:1P)</b> | 20  |                            |                            |                            |                            |                         |                         |
| <b>H (1H:1P)</b> | 20  | 0.94                       |                            |                            |                            |                         |                         |
| <b>P (1H:5P)</b> | 95  | 0.86                       | 0.26                       |                            |                            |                         |                         |
| <b>H (1H:5P)</b> | 19  | 0.04                       | 0.45                       | <b>2.01</b>                |                            |                         |                         |
| <b>P (6P)</b>    | 180 | 1.2                        | 1.89                       | 1.89                       | 1.27                       |                         |                         |
| <b>P (1P)</b>    | 29  | <b>2.92</b>                | 1.83                       | 1.45                       | <b>2.98</b>                | <b>3.72</b>             |                         |
| <b>H (1H)</b>    | 21  | <b>3.14</b>                | <b>2.17</b>                | <b>2.52</b>                | <b>3.03</b>                | <b>4.18</b>             | 0.97                    |

Results of Cox proportional hazards models comparing queen survival across treatments. Table entries are the magnitudes of Z scores for pairwise tests of the effect of queen type on survival; bold values indicate significant differences in survival between queen types ( $p < 0.05$ ). Row and column labels indicate population of origin (P for pleometrotic and H for haplometrotic), with the treatment group composition in parentheses. For example, P (1H:1P) refers to queens sampled from the pleometrotic population and placed in mixed pairs. The sample size N gives the number of individual queens in each treatment.

**Supplementary Table 2. Ant aggression by population and treatment**

| <b>Treatment</b>    | <b>Aggressive acts</b> | <b>Ant-days</b> | <b>Acts / Ant-day</b> |
|---------------------|------------------------|-----------------|-----------------------|
| P (6P)              | 35                     | 5808            | 0.006                 |
| P (1H:5P)           | 9                      | 2627            | 0.003                 |
| P (all groups of 6) | 44                     | 8435            | 0.005                 |
| P (1H:1P)           | 2                      | 610             | 0.003                 |
| P (all groups)      | 46                     | 9045            | 0.005                 |
| H (1H:5P)           | 16                     | 653             | 0.025                 |
| H (1H:1P)           | 7                      | 548             | 0.013                 |
| H (all groups)      | 23                     | 1201            | 0.019                 |

Each row shows aggressive acts per ant-day of observation, for a specific population (H or P) and treatment group (in parentheses). When results are summed for the two populations of origin, queens from the haplometrotic population showed significantly higher aggression rates than queens from the pleometrotic population ( $\chi^2=31.1$ ,  $df = 1$ ,  $p = 2.4e-08$ ).

44

**Supplementary Table 3.** Spatial analysis of colony distribution in the field

| Lake Henshaw   |                   |      |   | Pine Valley    |                   |         |   |
|----------------|-------------------|------|---|----------------|-------------------|---------|---|
| Number of rows | Number of columns | P    |   | Number of rows | Number of columns | P       |   |
| 2              | 2                 | 0.03 | * | 2              | 2                 | 0.00001 | * |
| 2              | 3                 | 0.44 |   | 2              | 3                 | 0.00972 | * |
| 2              | 4                 | 0.04 | * | 2              | 4                 | 0.00001 | * |
| 2              | 5                 | 0.74 |   | 2              | 5                 | 0.02497 | * |
| 2              | 6                 | 0.07 |   | 2              | 6                 | 0.00011 | * |
| 3              | 2                 | 0.13 |   | 3              | 2                 | 0.00019 | * |
| 3              | 3                 | 0.39 |   | 3              | 3                 | 0.14469 |   |
| 3              | 4                 | 0.09 |   | 3              | 4                 | 0.00005 | * |
| 3              | 5                 | 0.50 |   | 3              | 5                 | 0.14784 |   |
| 3              | 6                 | 0.44 |   | 3              | 6                 | 0.00800 | * |
| 4              | 2                 | 0.23 |   | 4              | 2                 | 0.00017 | * |
| 4              | 3                 | 0.90 |   | 4              | 3                 | 0.12938 |   |
| 4              | 4                 | 0.18 |   | 4              | 4                 | 0.00014 | * |
| 4              | 5                 | 0.67 |   | 4              | 5                 | 0.18403 |   |
| 4              | 6                 | 0.38 |   | 4              | 6                 | 0.00458 | * |
| 5              | 2                 | 0.56 |   | 5              | 2                 | 0.00003 | * |
| 5              | 3                 | 0.36 |   | 5              | 3                 | 0.33629 |   |
| 5              | 4                 | 0.38 |   | 5              | 4                 | 0.00002 | * |
| 5              | 5                 | 0.79 |   | 5              | 5                 | 0.05750 |   |
| 5              | 6                 | 0.58 |   | 5              | 6                 | 0.00509 | * |
| 6              | 2                 | 0.43 |   | 6              | 2                 | 0.00011 | * |
| 6              | 3                 | 0.87 |   | 6              | 3                 | 0.30290 |   |
| 6              | 4                 | 0.18 |   | 6              | 4                 | 0.00028 | * |
| 6              | 5                 | 0.80 |   | 6              | 5                 | 0.23197 |   |
| 6              | 6                 | 0.58 |   | 6              | 6                 | 0.1250  |   |

Each row shows results of a spatial clustering test for a particular number of quadrats, achieved by independently varying the number of rows and columns of quadrats. The pleometrotic population shows statistically significant clustering over a wider range of quadrat sizes than the haplometrotic population.

**Supplementary Table 4.** Agent-based model parameters

| <b>Parameter</b> | <b>Description</b>                                                       | <b>Value</b> |
|------------------|--------------------------------------------------------------------------|--------------|
| $N$              | Dimension of landscape                                                   | 100          |
| $m$              | Number of new queens                                                     | 100 - 1500   |
| $x_{C0}$         | Initial percentage of cooperative queens                                 | 5            |
| $r_C$            | Radius for clustering of queens                                          | 1-10         |
| $r_G$            | Radius for group competition                                             | 1-10         |
| $p_I$            | Probability a fierce queen initiate fighting                             | 0 -1         |
| $p_s$            | Probability that a cell is suitable for a colony                         | 1            |
| $p_m$            | Probability of mutation                                                  | 0.01         |
| $p_{DC}$         | Probability that a cooperative queen dies in a fight                     | 0.6          |
| $p_{DF}$         | Probability that a fierce queen dies in a fight with a cooperative queen | 0.4          |

Values used in simulations are given for each parameter. Where a range of values is indicated, multiple simulations were run at different values in the range.
